# Supplementary material for: Preventing Depression in Adults With Subthreshold Depression: Health-Economic Evaluation Alongside a Pragmatic Randomized Controlled Trial of a Web-Based Intervention
Source: PubMed Central journal article supplement (PMC5244034; doi:10.2196/jmir.6587), 2017-01-04

Figure 2 Frequencies of the number of sessions completed

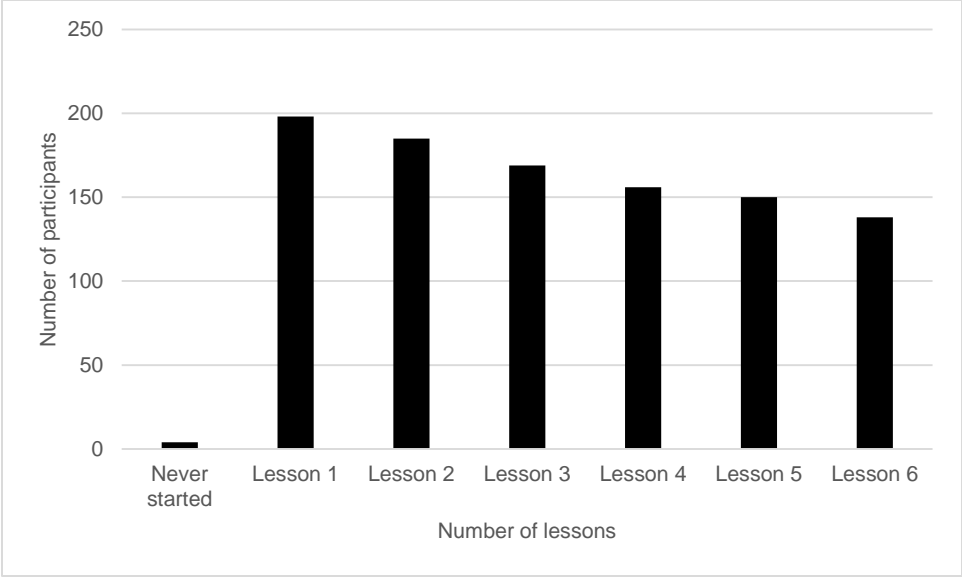

Supplement: jmir_v19i1e5_app1.pdf [file jmir_v19i1e5_app1.pdf]
